Y Kishimoto et al.

1 **Title:** *Ets2* frame-shift mutant models express in-frame mRNA by exon skipping that  
2 complements *Ets2* function in the skin

3

4 Yuki Kishimoto <sup>1#</sup>, Iori Nishiura <sup>1#</sup>, Shunsuke Yuri <sup>1</sup>, Nami Yamamoto <sup>1</sup>, Masahito Ikawa <sup>2</sup> and  
5 Ayako Isotani <sup>1\*</sup>.

6

7 1. Division of Biological Science, Graduate School of Science and Technology, Nara Institute  
8 of Science and Technology, 8916-5 Takayama-cho, Ikoma, Nara, 630-0192, Japan

9

10 2. Research Institute for Microbial Diseases, Osaka University, 3-1 Yamadaoka, Suita, Osaka  
11 565-0871, Japan

12

13 \* Corresponding author (isotani@bs.naist.jp)

14 # Equally contributed first authors

15

16 **Running title**

17 Phenotypes of new *Ets2* mutant models

18

19 **Key words**

20 *Ets2*, CRISPR/Cas9, exon skip, animal model

21

22 **Summary statement**

23 New *Ets2* mutant models showed embryonic lethal phenotype by a placental abnormality but  
24 did not exhibit a wavy hair phenotype as a previous model.

Y Kishimoto et al.

25 **Abstract**

26 The *Ets2* transcription factor has been implicated in various biological processes. An *Ets2*  
27 mutant model, which lacks the DNA-binding domain (ETS domain), was previously reported to  
28 exhibit embryonic lethality caused by a trophoblast abnormality. This phenotype could be  
29 rescued by tetraploid complementation, resulting in pups with wavy hair.

30 Here, we generated new *Ets2* mutant models with deletions in exon 8 and with frame-shift  
31 mutations using the CRISPR/Cas9 method. Homozygous mutants could not be obtained by  
32 natural mating as previously reported. After rescuing with tetraploid complementation,  
33 homozygous mutant mice were generated, but these mice did not exhibit wavy hair phenotype.  
34 Our newly generated mice exhibited exon 8 skipping, which led to in-frame mutant mRNA  
35 expression in the skin and thymus but not in E7.5 embryos. As this in-frame mutation contained  
36 the ETS domain, the exon 8-skipped *Ets2* mRNA was likely translated into protein in the skin  
37 that complemented the *Ets2* function. Thus, these *Ets2* mutant models, depending on the cell  
38 types, exhibited novel phenotypes due to exon skipping and are expected to be useful in several  
39 fields of research.

Y Kishimoto et al.

## 40 **Introduction**

41 E26 avian leukemia oncogene 2, 3' domain (Ets2), a member of the ETS family, is a  
42 transcription factor that contains an ETS winged helix-loop-helix DNA-binding domain (ETS  
43 domain) that binds to GGA(A/T) DNA sequences. It is conserved in various species, including  
44 mice and humans (Karim et al., 1990; Seidel and Graves, 2002; Sharrocks, 2001). Ets2 has been  
45 implicated in various biological contexts, including placentation, hair formation, mammary  
46 tumors, inflammatory responses, angiogenesis, and the pulmonary fibrosis (Baran et al., 2011;  
47 Man et al., 2003; Wei et al., 2004; Wei et al., 2009; Yamamoto et al., 1998).

48 In a previous study, Ets2-deficient mice (*Ets2<sup>dbl/dbl</sup>* mice), which lack the ETS domain  
49 through deletion of exons 9 and 10, were found to exhibit early embryonic lethality due to a  
50 trophoblast abnormality. The tetraploid complementation technique could rescue this  
51 placental abnormality, allowing for survival of the offspring (Yamamoto et al., 1998), indicating  
52 that Ets2 is essential for placental development. *Ets2<sup>dbl/dbl</sup>* mice created using the tetraploid  
53 complementation technique exhibit a variety of phenotypes, such as wavy hair, curly whisker,  
54 and a rounded forehead, allowing them to be identified. However, their fertility is normal, and  
55 they exhibit no lethal phenotype after birth. Therefore, the *Ets2<sup>dbl/dbl</sup>* mouse is a useful model  
56 for studying treatment methods for placental abnormalities (Okada et al., 2007).

57 The generation of gene-deficient animal models is now commonly performed using  
58 CRISPR/Cas9-based genome engineering (Cong et al., 2013; Mali et al., 2013). Model  
59 organisms made using this technique can completely mimic the genome mutations found in  
60 human diseases, such as indel mutations and substitutions, which were previously difficult to  
61 generate using the conventional knockout method. Further, homozygous mutant mice can be  
62 obtained efficiently in the founder generation by directly delivering the crRNA/tracrRNA/Cas9

Y Kishimoto et al.

63 ribonucleoprotein complex into a mouse zygote via electroporation (Hashimoto et al., 2016).  
64 Unfortunately, if the homozygous mutant exhibits embryonic lethality, it cannot be obtained in  
65 this way. However, it is possible to obtain placental-deficient mutant mice, such as *Ets2*, in the  
66 founder generation using the tetraploid complementation method (Nagy et al., 1993) in  
67 combination with genome-edited zygotes or their embryonic stem cells.

68 Using the above strategy, we established new *Ets2* mutant mouse lines that contain a frame-  
69 shift deletion in exon 8, which is located before the ETS domain encoded by exons 9 and 10.  
70 These genomic mutations were predicted to produce a transcriptional product that would  
71 undergo nonsense-mediated mRNA decay (NMD) or, if translated, a protein lacking the ETS  
72 domain. We found that some of the phenotypes exhibited by these mice differed from the  
73 previous study, whose origin was investigated in this work.

Y Kishimoto et al.

## 74 **Results**

### 75 **Generation of new *Ets2* mutant mice**

76 On the basis of a previous study (Yamamoto et al., 1998), we designed three gRNA targeted  
77 to sites in exon 8 that would induce a frame-shift mutation, leading to a deficiency in the ETS  
78 domain, encoded by exons 9 and 10 (Fig. 1A). The riboprotein complex, which consisted of  
79 three designed crRNAs, tracrRNAs, and Cas9 protein, was electroporated into one-cell stage  
80 zygotes, which developed until the eight-cell stage. These genome-edited embryos were used  
81 for the tetraploid complementation method in order to obtain homozygous mutant mice in the  
82 founder generation (Fig. 1B). However, no homozygous mutant mice were born from the 29  
83 transferred embryos.

84 Two out of three delivered pups had a heterozygous deletion mutation, which was determined  
85 by PCR analysis. One mutation was a 205-bp deletion (hereafter referred to as *em1*), and the  
86 other was an 82 bp deletion (hereafter referred to as *em2*) (Figs. 1C, D). Expectedly, both had  
87 frame-shift mutations.

88

### 89 **Assessment of the development of the newly generated *Ets2* mutant mice**

90 Previous reports indicated that *Ets2*<sup>*dbl/dbl*</sup> mice exhibit an embryonic lethal phenotype due to a  
91 placental deficiency (Yamamoto et al., 1998). Sixteen pups were obtained from three  
92 derivations, and as expected, none of the pups included the double mutant alleles (*em1/em2*)  
93 (Table S1). Further, we analyzed the developmental ability of *Ets2* mutant mice by performing a  
94 test cross using *Ets2*<sup>*+/em1*</sup> mice and assessed the genotypes of the offspring. No homozygous  
95 mutant pups (*Ets2*<sup>*em1/em1*</sup>) were born (wild: hetero: homo = 45: 91: 0, Table S1).

Y Kishimoto et al.

96 A previous study reported that *Ets2<sup>dbl/dbl</sup>* embryos were degenerated by the placental  
97 deficiency around E7.5 and disappeared after E8.5. To investigate whether the *Ets2<sup>em1/em1</sup>* mutant  
98 phenocopies the *Ets2<sup>dbl/dbl</sup>* mutant, we crossed *Ets2<sup>+/em1</sup>* animals and observed embryos at  
99 several stages. *Ets2<sup>em1/em1</sup>* embryos at E7.5 were slightly delayed in their developmental stage  
100 but clearly progressed in a comparable manner to embryos from *Ets2<sup>dbl/dbl</sup>* animals. The  
101 *Ets2<sup>em1/em1</sup>* embryos had survived at E8.5, but all of them were retarded. By E9.5 and E10.5,  
102 some malformed *Ets2<sup>em1/em1</sup>* embryos were present and developed before the turning of the  
103 embryo, which usually occurred at approximately E8.5 (Fig. 2A and Table S2).

104 As the frame-shift mutation in *Ets2<sup>em1/em1</sup>* is located in exon 8, the stop codon occurs before  
105 exon 9, and the original stop codon is located in exon 10. For this reason, NMD might occur,  
106 such that the *em1* mutant mRNA may be degraded in *Ets2<sup>em1/em1</sup>* embryos. To confirm this, we  
107 performed RT-PCR using E7.5 embryos. Embryos were separated into the posterior  
108 trophoctoderm (TE) and anterior epiblast (Epi). Both regions expressed *em1* mutant mRNA, and  
109 their sequences included 205 nt deletions that were predicted from the genomic sequence. It is  
110 likely the case that the *em1* mutant exhibited a distinct phenotype compared with the *Ets2*  
111 mutant if the *em1* mRNA was translated into a protein product (Fig. S3).

112

### 113 **Establishment of *Ets2* homozygous mutant ESC lines and phenotypic analysis after birth**

114 By rescuing placental function using the tetraploid complementation method, *Ets2<sup>dbl/dbl</sup>*  
115 offspring were successfully developed to term. Therefore, we attempted the same experiment to  
116 define whether the embryonic lethal phenotype of *Ets2<sup>em1/em1</sup>* was dependent on the placental  
117 deficiency or not.

Y Kishimoto et al.

118 Before conducting the tetraploid complementation, we established *Ets2<sup>em1/em1</sup>* and *Ets2<sup>em2/em2</sup>*  
119 ESC lines. In this way, we improved the efficiency of obtaining homozygous mutant mice  
120 because the ratio of homozygous mutant embryos was only one out of four when we used  
121 embryos from a heterozygous crossing. After crossing heterozygotes, two-cell embryos were  
122 collected and developed until the blastocyst stage. ESC lines were established from the  
123 collected blastocysts and analyzed by genotyping. The rate of homozygous mutant ESC line  
124 establishment for both the *Ets2<sup>em1/em1</sup>* and *Ets2<sup>em2/em2</sup>* mutants followed Mendel's law (Table S3).

125 Using the tetraploid complementation method, offspring were obtained from *Ets2<sup>em1/em1</sup>* and  
126 *Ets2<sup>em2/em2</sup>* ESC lines (Figs. 3A, B and Table S4). This result indicated that the embryonic  
127 lethality observed for the *Ets2<sup>em1/em1</sup>* and *Ets2<sup>em2/em2</sup>* genotypes was due to a dysfunction of  
128 placental differentiation, the same as that seen for the *Ets2<sup>dbl/dbl</sup>* mutant. Unexpectedly, wavy  
129 hair and curly whisker phenotypes were not observed in *Ets2<sup>em1/em1</sup>* or *Ets2<sup>em2/em2</sup>* mice (Figs. 3B,  
130 C).

131 To corroborate the relationship between *Ets2* and the wavy hair phenotype, we established a  
132 null mutant ES cell line, in which a region upstream of exon 2 through the 3'-UTR of exon 10  
133 was deleted, including all open reading frame (ORF) regions. Pups were then generated using  
134 the tetraploid complementation method (Fig. S1 and Table S5). Both the wavy hair and curly  
135 whisker phenotypes were observed in *Ets2 null* mice from around 2-weeks of age, as was  
136 observed for *Ets2<sup>dbl/dbl</sup>* mice.

137

### 138 **Gene expression in *Ets2<sup>em1/em1</sup>* skin**

139 In this study, newly established *Ets2<sup>em1/em1</sup>* and *Ets2<sup>em2/em2</sup>* mice exhibited an embryonic lethal  
140 phenotype due to placental dysfunction but did not exhibit the wavy hair phenotype of *Ets2<sup>dbl/dbl</sup>*

Y Kishimoto et al.

141 mice, despite having a frame-shift mutation. Therefore, we next investigated the *Ets2* gene  
142 expression from the *Ets2* locus in the skin of *Ets2<sup>em1/em1</sup>* mice.

143 In 4-week-old mice, the expression of the mRNA was detected in the skin of wildtype and  
144 *Ets2<sup>em1/em1</sup>* mice but not in the skin of *Ets2 null* mice. Notably, two sizes of fragments were  
145 detected in *Ets2<sup>em1/em1</sup>* skin samples (Fig. 4A).

146 We hypothesized that the unexpected fragment size might be attributed to a splice variant and  
147 that this could explain the differences in phenotype between *Ets2<sup>em1/em1</sup>* and *Ets2<sup>dbl/dbl</sup>* animals.  
148 Therefore, we next analyzed the sequences of the potential splice variants. Although the large  
149 bands observed for the *Ets2<sup>em1/em1</sup>* skin and thymus and *Ets2<sup>em2/em2</sup>* thymus represented the  
150 expected frame-shifted sequences, the sequences of the smaller bands showed skipping of exon  
151 8, which was in-frame and consisted of 264 bp (Fig. 4B and Fig. S2). This *Ets2* protein, which  
152 skipped exon 8, was predicted to contain the ETS domain based on the SMART online database  
153 (SMART) (Fig. S3).

154 Further, we examined the gene expression of *MMP-3* and *MMP-9* in *Ets2<sup>em1/em1</sup>* skins, since a  
155 previous report showed that expression of these genes was decreased in *Ets2<sup>dbl/dbl</sup>* mice  
156 (Yamamoto et al., 1998). However, the expression levels of *MMP-3* and *MMP-9* in 4-week-old  
157 *Ets2<sup>em1/em1</sup>* skins were not reduced compared with the wildtype, even though they were reduced  
158 in the *Ets2 null* (Fig. 4C).



Y Kishimoto et al.

159 **Discussion**

160 In this work, we newly generated two *Ets2* mutant models, namely, *em1* and *em2*, which  
161 contained frame-shift genomic mutations with the stop codon located before the ETS domain.  
162 We predicted that both mutant proteins would lack the ETS domain if they were translated.  
163 Therefore, we expected that the phenotypes in these homozygous mutants would mimic those  
164 described in previous reports for *Ets2<sup>db1/db1</sup>* mice. Indeed, *Ets2<sup>em1/em1</sup>* mice exhibited the same  
165 embryonic lethal phenotype, although the survival period was a little longer than that observed  
166 for *Ets2<sup>db1/db1</sup>* mice (Yamamoto et al., 1998).

167 A previous study suggested that different phenotypes observed in genomic mutants in mice  
168 could be attributed to differences in strain backgrounds (Coley et al., 2016; Desroches-Castan et  
169 al., 2019; Montagutelli, 2000). The *Ets2<sup>db1/db1</sup>* mutant was established using the Swiss Black and  
170 129/Sv strains of mice, and we established the *Ets2<sup>em1/em1</sup>* and *Ets2<sup>em2/em2</sup>* mutants using the  
171 B6D2F1 mix background. The variation between these strains might have resulted in the minor  
172 difference in the embryonic lethal phenotype that we observed, which was caused by a  
173 trophectodermal abnormality.

174 On the other hand, the wavy hair and curly whisker phenotypes observed in *Ets2<sup>db1/db1</sup>* mice  
175 did not occur in our *Ets2<sup>em1/em1</sup>* and *Ets2<sup>em2/em2</sup>* mice. We found that the skin of *Ets2<sup>em1/em1</sup>* mice  
176 expressed a mutant mRNA lacking exon 8 that could potentially be translated into a protein,  
177 including the ETS domain. Indeed, it is possible that this exon 8 skip protein, including the ETS  
178 domain, could rescue *Ets2* function in hair and whisker. This was strongly suggested by the  
179 finding that these mice exhibited comparable levels of *MMP-3* and *MMP-9* mRNAs to  
180 wildtype, and *Ets2<sup>db1/db1</sup>* and *Ets2 null* mice exhibited decreased expression.

Y Kishimoto et al.

181 DNA mutations in a genetic locus frequently lead to exon skipping, and several human  
182 diseases are linked to these types of exon skipping events. In addition, exon skipping can occur  
183 because of lack of exonic splicing enhancer sequences or an exonic splicing silencer sequence  
184 inside of an exon (Baralle and Giudice, 2017; Cartegni et al., 2002).

185 Some reports have also suggested that unexpected exon skips can occur when using the  
186 CRISPR/Cas9 system, indicating that a frame-shifted mutant exon induced by CRISPR/Cas9 is  
187 skipped but can be induced through alternative splicing or in-frame exon skipping (Chen et al.,  
188 2018; Mou et al., 2017; Sui et al., 2018; Tuladhar et al., 2019). Since the exon 8 skip mRNA in  
189 the skin and thymus of *Ets2<sup>em1/em1</sup>* is in-frame and the *em1* mRNA sequence was designed as a  
190 frame-shift mutation, we believe that a portion of the *em1* pre-mRNA could have been spliced  
191 through the same mechanism as described in previous studies (Chen et al., 2018; Mou et al.,  
192 2017; Sui et al., 2018; Tuladhar et al., 2019).

193 Further, in this study, the exon skip found was only identified in the skin and thymus and was  
194 not detected during embryonic stages. Thus, the induction of the exon skip was likely due to the  
195 changes in mRNA splicing that were dependent on the cell type or developmental stage, despite  
196 having the same genomic mutation. This phenomenon has a possible effect on the appearance of  
197 phenotypes. This is a novel finding of this study. Further, this finding suggested that all ORF-  
198 deletion models are adequate for analysis of the genes' functions.

199 During the development of the neuron and heart, tissue-specific RNA binding proteins that  
200 induce alternative splicing are expressed (Baralle and Giudice, 2017). Moreover, epigenetic  
201 modifications, such as DNA methylation and histone modifications, can result in tissue-specific  
202 alternative splicing (Baralle and Giudice, 2017). Thus, these phenomena might affect the  
203 differences in the splicing pattern in the mutant tissues.

Y Kishimoto et al.

204 Ets2 plays a role not only in trophoblast formation and hair morphology but also in cancer,  
205 angiogenesis, and the immune system. Therefore, the newly generated *Ets2* mutant models in  
206 this report will likely be applicable to several different research fields, such as physiological  
207 research *in vivo* and molecular biological research into splicing.

Y Kishimoto et al.

208 **Methods**

209 **Animals**

210 All animal experiments were conducted in accordance with the guidelines of “Regulations and  
211 By-Laws of Animal Experimentation at the Nara Institute for Science and Technology,” and  
212 were approved by the Animal experimental Committee at the Nara Institute of Science and  
213 Technology (the approval no.1639). B6D2F1 female mice and ICR mice were purchased from  
214 SLC (Japan). C57BL/6J male mice were purchased from CLEA (Japan).

215

216 **Collection of zygotes**

217 Female mice were treated by PMSG and hCG for superovulation, then mated with male mice.  
218 Pronuclear stage zygotes were collected from female oviducts after 20 hours of hCG injection.  
219 After removing cumulus cells using hyaluronidase, zygotes were incubated in KSOM at 37°C  
220 under 5% CO<sub>2</sub> in the air until use. 2-cell stage zygotes were collected from female oviducts  
221 after 42-46 hours of hCG injection by the flush-out method. Collected 2-cell stage embryos  
222 were incubated until use the same as above.

223

224 **Generation of *Ets2* mutant zygote by CRISPR/Cas9 system using electroporation**

225 Target sites of guide RNA (gRNA) were designed using the web tool CRISPR direct [24].

226 Genome editing by electroporation was performed as a previous study [12].

227 CFB16-HB and LF501PT1-10 electrode (BEXCo.Ltd., Tokyo, Japan) were used for  
228 electroporation. 30–40 pronuclear stage zygotes were subjected to electroporation at one time.  
229 Zygotes were washed with Opti-MEM I (Thermofisher) three times, subsequently placed in a  
230 line in the electrode gap filled with 5 µl the mixture of 120 ng/µl Cas9 protein (TaKaRa, Japan),

Y Kishimoto et al.

231 300 ng/ $\mu$ l *tracerRNA*, and 200 ng/ $\mu$ l *crRNA* (HPLC grade, Fasmac) in Opti-MEM I. The  
232 electroporation condition was performed were 30V (3 msec ON  $\pm$  97 msec OFF) four times.  
233 After electroporation, zygotes were washed with KSOM three times then cultured until  
234 developing the eight-cell stage. Eight-cell stage embryos were provided to the tetraploid  
235 complementation.

236

### 237 **Establishment of *Ets2* mutated ESC lines**

238 To establish *the Ets2* homozygous mutant model, collected 2-cell stage embryos  
239 from *Ets2* heterozygous mutant parents were incubated until the blastocyst stage, removing the  
240 Zona pellucida (ZP) using Acidic Tyrode solution (Sigma T1788). Blastocyst embryos without  
241 the ZP were seed on gelatin-coated 60-mm dishes and cultured on mouse embryonic fibroblast  
242 (MEF) with N2B27 medium supplemented with 3  $\mu$ M CHIR99021(Axon1386), 1.5  $\mu$ M  
243 CGP77675 (Sigma SML0314), and mouse LIF (N2B27-a2i/L medium) [25]. After seven days,  
244 the outgrowth of blastocysts was disaggregated by 0.25% trypsin in 1mM EDTA in PBS (-).  
245 Half of the cells were seeded on MEF with the gelatin-coated dishes for expanding. The others  
246 were seeded on the gelatin-coated dishes without MEF for genotyping by PCR.  
247 *Ets2* homozygous mutant ESC lines were provided for tetraploid complementation.  
248 The *Ets2* null mutant model was established using ESCs, as performed in a previous study (Oji  
249 et al., 2016). mF1-05 ESC line, which was newly established from 129X1 and C57BL6/J F1  
250 embryo, was seeded on MEF then transfected with two designed pSpCas9(BB)-2A-Puro  
251 (pX459) V2.0 (Addgene #62988) plasmids using Lipofectamine 3000 (Thermofisher).  
252 Transfected cells were selected by transient treatment with 1  $\mu$ g/ml puromycin; then, ESC

Y Kishimoto et al.

253 colonies were subject to genotyping with PCR and sequencing. The *Ets2* null mutant ESC line  
254 was provided for tetraploid complementation.

255

### 256 **Tetraploid complementation**

257 Tetraploid embryos were prepared as described previously (Kokubu et al., 2009; Okada et al.,  
258 2007). In brief, ICR two-cell stage embryos were placed in a fusion buffer, and electrofusion  
259 was performed by applying 140 V for 50 ms after aligning embryos between the electrodes.  
260 CFB16-HB and LF501PT1-10 electrode (BEXCo.Ltd., Tokyo, Japan) were used for cell  
261 fusion.

262 A wild-type tetraploid four-cell embryo and a genome-edited diploid eight-cell embryo were  
263 aggregated after removing the zona pellucida for the aggregation method. For the injection  
264 method, *Ets2* mutant ESCs were injected into a wild-type tetraploid four-cell embryo or  
265 blastocyst. These embryos were cultured until the blastocysts stage and transferred into the  
266 uterus of E2.5 pseudopregnant ICR mice. Offspring were recovered by natural delivery or  
267 Caesarean section on E19.5. The mutation of the offspring was detected by genotyping with  
268 PCR and sequencing.

269

### 270 **Genotyping**

271 Genotyping primers for detecting *Ets2*-wild, em 1, and em 2 alleles were 5'-  
272 ctgagtttaagagtgctcggagg-3' (*Ets2\_Fw*) and 5'- gcctataggacttgtgtacagg-3' (*Ets2\_Rev*). Primers  
273 for *Ets2* null mutant allele(s) were 5'-tgtggagtctcacatcgaag-3' (*Ets2\_Ex2\_F*) and 5'-  
274 gggcctgctcgggtgccacgg-3' (*Ets2\_EX10\_R*). DNA fragments were amplified using GoTaq  
275 (Promega) for 40 cycles under the following conditions: 94 °C for 30 sec, 60 °C for 30 sec and

Y Kishimoto et al.

276 68 °C for 40 sec for detecting wild, em1 or em2 allele, and 94 °C for 30 sec, 60 °C for 30 sec  
277 and 68 °C for 20 sec for detecting the null allele, respectively.

278

### 279 **RNA expression analysis**

280 Mouse cDNAs were prepared from 4-week old skin, adult skin, and adult thymus using  
281 SuperScript III Reverse Transcriptase (Thermo Fisher Scientific) after purified RNA by Trizol  
282 reagent (Thermo Fisher Scientific). RT-PCR was performed using 20 ng of cDNA with the  
283 following primers: 5'-CGTGAATTTGCTCAACAACAATTCTG-3' and 5'-gagaggctatgccggt-  
284 3' for *Ets2* and 5'-CCAGTATGACTCCACTCACG-3' and 5'-  
285 GACTCCACGACATACTCAGC-3 for *Gapdh* (Wen et al., 2007). cDNA fragments were  
286 amplified using KOD Fx Neo (TOYOBO) or GoTaq (Promega) for 35 cycles under the  
287 following conditions: 94 °C for 30 sec, 60 °C for 30 sec and 72 °C for 40 sec for *Ets2*, and  
288 94 °C for 30 sec, 53 °C for 30 sec and 72 °C for 30 sec for *Gapdh*.

289 Quantitative real-time PCR was performed using 20 ng of cDNA with following primers: 5'-  
290 TTAAAGACAGGCACTTTTGG-3' and 5'-CAGGGTGTGAATGCTTTTAG-3' for *Mmp3*, 5'-  
291 CGTCTGAGAATTGAATCAGC-3' and 5'-AGTAGGGGCAACTGAATACC-3'  
292 for *Mmp9* expression (Man et al., 2003). Gene expression level was normalized by *Gapdh*, the  
293 same cDNA. The primer set for *Gapdh* was the same as above. Real-time PCR was performed  
294 by LightCycler96 (Roche) using Luna Universal qPCR Master Mix (NEB), and the data were  
295 analyzed by LightCycler software.

296

### 297 **Statistics analysis**

Y Kishimoto et al.

298       The statistical difference was determined using the Student t-test. Differences were  
299       considered statistically significant if the P-value was less than 0.05.



Y Kishimoto et al.

300 **Acknowledgements**

301 The authors would like to thank Enago ([www.enago.jp](http://www.enago.jp)) for the English language review.

302

303 **Competing interests**

304 The authors declare no competing financial interests.

305

306 **Author contributions**

307 A.I., Y.K., I.N. performed most experiments, assisted by N.Y. who performed tetraploid  
308 complementation, and S.Y., performed qPCR. A.I., S.Y., and M.I. analyzed the data. A.I. wrote  
309 the manuscript and all authors discussed the results and commented on the manuscript.

310

311 **Funding**

312 This work was supported by JSPS KAKENHI Grant Number 16K07091, 18H04885, Start Up

313 Fund for female researchers in NAIST, and KAC 40th Anniversary Research Grant.

Y Kishimoto et al.

314 **References**

- 315 **Baralle, F. E. and Giudice, J.** (2017). Alternative splicing as a regulator of development and tissue  
316 identity. *Nat Rev Mol Cell Biol* **18**, 437-451.
- 317 **Baran, C. P., Fischer, S. N., Nuovo, G. J., Kabbout, M. N., Hitchcock, C. L., Bringardner, B. D.,**  
318 **McMaken, S., Newland, C. A., Cantemir-Stone, C. Z., Phillips, G. S., et al.** (2011). Transcription  
319 factor ets-2 plays an important role in the pathogenesis of pulmonary fibrosis. *Am J Respir Cell*  
320 *Mol Biol* **45**, 999-1006.
- 321 **Cartegni, L., Chew, S. L. and Krainer, A. R.** (2002). Listening to silence and understanding  
322 nonsense: exonic mutations that affect splicing. *Nat Rev Genet* **3**, 285-298.
- 323 **Chen, D., Tang, J. X., Li, B., Hou, L., Wang, X. and Kang, L.** (2018). CRISPR/Cas9-mediated  
324 genome editing induces exon skipping by complete or stochastic altering splicing in the  
325 migratory locust. *BMC Biotechnol* **18**, 60.
- 326 **Coley, W. D., Bogdanik, L., Vila, M. C., Yu, Q., Van Der Meulen, J. H., Rayavarapu, S., Novak, J.**  
327 **S., Nearing, M., Quinn, J. L., Saunders, A., et al.** (2016). Effect of genetic background on the  
328 dystrophic phenotype in mdx mice. *Hum Mol Genet* **25**, 130-145.
- 329 **Cong, L., Ran, F. A., Cox, D., Lin, S., Barretto, R., Habib, N., Hsu, P. D., Wu, X., Jiang, W.,**  
330 **Marraffini, L. A., et al.** (2013). Multiplex genome engineering using CRISPR/Cas systems.  
331 *Science* **339**, 819-823.
- 332 **Desroches-Castan, A., Tillet, E., Ricard, N., Ouarné, M., Mallet, C., Feige, J. J. and Bailly, S.**  
333 (2019). Differential Consequences of. *Cells* **8**.
- 334 **Hashimoto, M., Yamashita, Y. and Takemoto, T.** (2016). Electroporation of Cas9 protein/sgRNA  
335 into early pronuclear zygotes generates non-mosaic mutants in the mouse. *Dev Biol* **418**, 1-9.

Y Kishimoto et al.

- 336 Karim, F. D., Urness, L. D., Thummel, C. S., Klemsz, M. J., McKercher, S. R., Celada, A., Van  
337 Beveren, C., Maki, R. A., Gunther, C. V. and Nye, J. A. (1990). The ETS-domain: a new DNA-  
338 binding motif that recognizes a purine-rich core DNA sequence. *Genes Dev* **4**, 1451-1453.
- 339 Kokubu, C., Horie, K., Abe, K., Ikeda, R., Mizuno, S., Uno, Y., Ogiwara, S., Ohtsuka, M., Isotani,  
340 A., Okabe, M., et al. (2009). A transposon-based chromosomal engineering method to survey a  
341 large cis-regulatory landscape in mice. *Nat Genet* **41**, 946-952.
- 342 Mali, P., Yang, L., Esvelt, K. M., Aach, J., Guell, M., DiCarlo, J. E., Norville, J. E. and Church, G.  
343 M. (2013). RNA-guided human genome engineering via Cas9. *Science* **339**, 823-826.
- 344 Man, A. K., Young, L. J., Tynan, J. A., Lesperance, J., Egeblad, M., Werb, Z., Hauser, C. A.,  
345 Muller, W. J., Cardiff, R. D. and Oshima, R. G. (2003). Ets2-dependent stromal regulation of  
346 mouse mammary tumors. *Mol Cell Biol* **23**, 8614-8625.
- 347 Montagutelli, X. (2000). Effect of the genetic background on the phenotype of mouse mutations.  
348 *J Am Soc Nephrol* **11 Suppl 16**, S101-105.
- 349 Mou, H., Smith, J. L., Peng, L., Yin, H., Moore, J., Zhang, X. O., Song, C. Q., Sheel, A., Wu, Q.,  
350 Ozata, D. M., et al. (2017). CRISPR/Cas9-mediated genome editing induces exon skipping by  
351 alternative splicing or exon deletion. *Genome Biol* **18**, 108.
- 352 Nagy, A., Rossant, J., Nagy, R., Abramow-Newerly, W. and Roder, J. C. (1993). Derivation of  
353 completely cell culture-derived mice from early-passage embryonic stem cells. *Proc Natl Acad*  
354 *Sci U S A* **90**, 8424-8428.
- 355 Oji, A., Noda, T., Fujihara, Y., Miyata, H., Kim, Y. J., Muto, M., Nozawa, K., Matsumura, T.,  
356 Isotani, A. and Ikawa, M. (2016). CRISPR/Cas9 mediated genome editing in ES cells and its  
357 application for chimeric analysis in mice. *Sci Rep* **6**, 31666.

Y Kishimoto et al.

- 358 **Okada, Y., Ueshin, Y., Isotani, A., Saito-Fujita, T., Nakashima, H., Kimura, K., Mizoguchi, A., Oh-**  
359 **Hora, M., Mori, Y., Ogata, M., et al.** (2007). Complementation of placental defects and  
360 embryonic lethality by trophoblast-specific lentiviral gene transfer. *Nat Biotechnol* **25**, 233-237.
- 361 **Seidel, J. J. and Graves, B. J.** (2002). An ERK2 docking site in the Pointed domain distinguishes a  
362 subset of ETS transcription factors. *Genes Dev* **16**, 127-137.
- 363 **Sharrocks, A. D.** (2001). The ETS-domain transcription factor family. *Nat Rev Mol Cell Biol* **2**,  
364 827-837.
- 365 **SMART** <http://smart.embl-heidelberg.de/>.
- 366 **Sui, T., Song, Y., Liu, Z., Chen, M., Deng, J., Xu, Y., Lai, L. and Li, Z.** (2018). CRISPR-induced  
367 exon skipping is dependent on premature termination codon mutations. *Genome Biol* **19**, 164.
- 368 **Tuladhar, R., Yeu, Y., Tyler Piazza, J., Tan, Z., Rene Clemenceau, J., Wu, X., Barrett, Q., Herbert,**  
369 **J., Mathews, D. H., Kim, J., et al.** (2019). CRISPR-Cas9-based mutagenesis frequently provokes  
370 on-target mRNA misregulation. *Nat Commun* **10**, 4056.
- 371 **Wei, G., Guo, J., Doseff, A. I., Kusewitt, D. F., Man, A. K., Oshima, R. G. and Ostrowski, M. C.**  
372 (2004). Activated *Ets2* is required for persistent inflammatory responses in the mouse viable  
373 model. *J Immunol* **173**, 1374-1379.
- 374 **Wei, G., Srinivasan, R., Cantemir-Stone, C. Z., Sharma, S. M., Santhanam, R., Weinstein, M.,**  
375 **Muthusamy, N., Man, A. K., Oshima, R. G., Leone, G., et al.** (2009). *Ets1* and *Ets2* are required  
376 for endothelial cell survival during embryonic angiogenesis. *Blood* **114**, 1123-1130.
- 377 **Wen, F., Tynan, J. A., Cecena, G., Williams, R., Múnera, J., Mavrothalassitis, G. and Oshima, R.**  
378 **G.** (2007). *Ets2* is required for trophoblast stem cell self-renewal. *Dev Biol* **312**, 284-299.

Y Kishimoto et al.

- 379 Yamamoto, H., Flannery, M. L., Kupriyanov, S., Pearce, J., McKercher, S. R., Henkel, G. W., Maki,  
380 R. A., Werb, Z. and Oshima, R. G. (1998). Defective trophoblast function in mice with a targeted  
381 mutation of *Ets2*. *Genes Dev* **12**, 1315-1326.

Y Kishimoto et al.

382 **Figure legends**

383 **Fig. 1 Generation of new *Ets2* mutant models.** (A) Design of crRNA targeting sites in exon 8  
384 of the *Ets2* gene and checking primer positions. (B) Strategy for obtaining *Ets2* homozygous  
385 mutant 1 in F0 generation using the electroporation technique and the tetraploid method. (C)  
386 Genotyping of the two newly generated *Ets2* mutants in F0 generation. Both had a wildtype  
387 (WT: 564 bp) allele and a deletion allele (*em1* or *em2*), which were detected as shorter bands  
388 than WT. D, DNA sequence of mutant alleles and crRNA targeted sequences. The 205 bp  
389 deleted ( $\Delta 205$  bp) allele was named *em1*, and the 82 bp deleted ( $\Delta 82$  bp) allele was named *em2*.  
390

391 **Fig. 2 Development of *Ets2*<sup>em1/em1</sup> embryos.** (A) From E7.5 to E10.5, embryos were observed  
392 after crossing *Ets2*<sup>+/*em1*</sup> females and males. *Ets2*<sup>em1/em1</sup> embryos are indicated as circles in each  
393 picture. The regions outside of the circles correspond to *Ets2*<sup>+/+</sup> or *Ets2*<sup>+/*em1*</sup> embryos. The  
394 genotype of the embryo indicated by an asterisk at E9.5 could not be determined. All scale bars  
395 indicate 1 mm. (B) Gene expressions of E7.5 WT and *Ets2*<sup>em1/em1</sup> (*em1*) embryos. Embryos were  
396 separated into trophectodermal tissue (TE), including ectoplacental corn, and epiblast (Epi),  
397 from which RNA and cDNA were prepared. Both *em1* bands were shifted to be lower than the  
398 WT bands. The DNA sequences of the *em1* bands were the same as *em1L* in Fig. 4B.  
399

400 **Fig. 3 Assessment of hair and whisker phenotypes after birth in newly generated *Ets2***  
401 **mutant mice.** (A) Strategy for the generation of *Ets2* homozygous mutant mouse with ESCs  
402 using the tetraploid complementation. (B) 2-week-old *Ets2*<sup>em1/em1</sup> (left picture) and *Ets2*<sup>em2/em2</sup>  
403 (right picture) mice. (C) Faces of 4-week-old in *Ets2*<sup>+/*em1*</sup> (left picture) and *Ets2*<sup>em1/em1</sup> (right  
404 picture). Curly whiskers were not observed in *Ets2*<sup>em1/em1</sup>.

Y Kishimoto et al.

405

406 **Fig. 4 Gene expression in the *Ets2*<sup>em1/em1</sup> skin.** (A) Gene expression from the *Ets2* locus in 4-  
407 week-old skin of WT, *Ets2 null* mutant (null), and *Ets2*<sup>em1/em1</sup> (em1) mice. From em1 skin, two  
408 types of mRNA were expressed, although both were shorter than WT. The larger mRNA from  
409 em1 skin was called em1L, and the smaller mRNA was called em1S. (B) Sequences of em1L  
410 and em1S. Em1L was the expected sequence, but em1S contained a deleted locus that matched  
411 exon 8, shown in Fig. S2. (C) Gene expression of *Mmp3* and *Mmp9* in the *Ets2*<sup>em1/em1</sup> skin.  
412 There were significant differences in the expression level of *Mmp3* between WT and null, em1  
413 and null, and WT and em1. The expression level of *Mmp9* in the null skin was slightly  
414 decreased compared with WT, but not significantly, and em1 showed a significant difference  
415 compared with null. \*p < 0.05, \*\*p < 0.01.

Fig 1 Y Kishimoto et al.

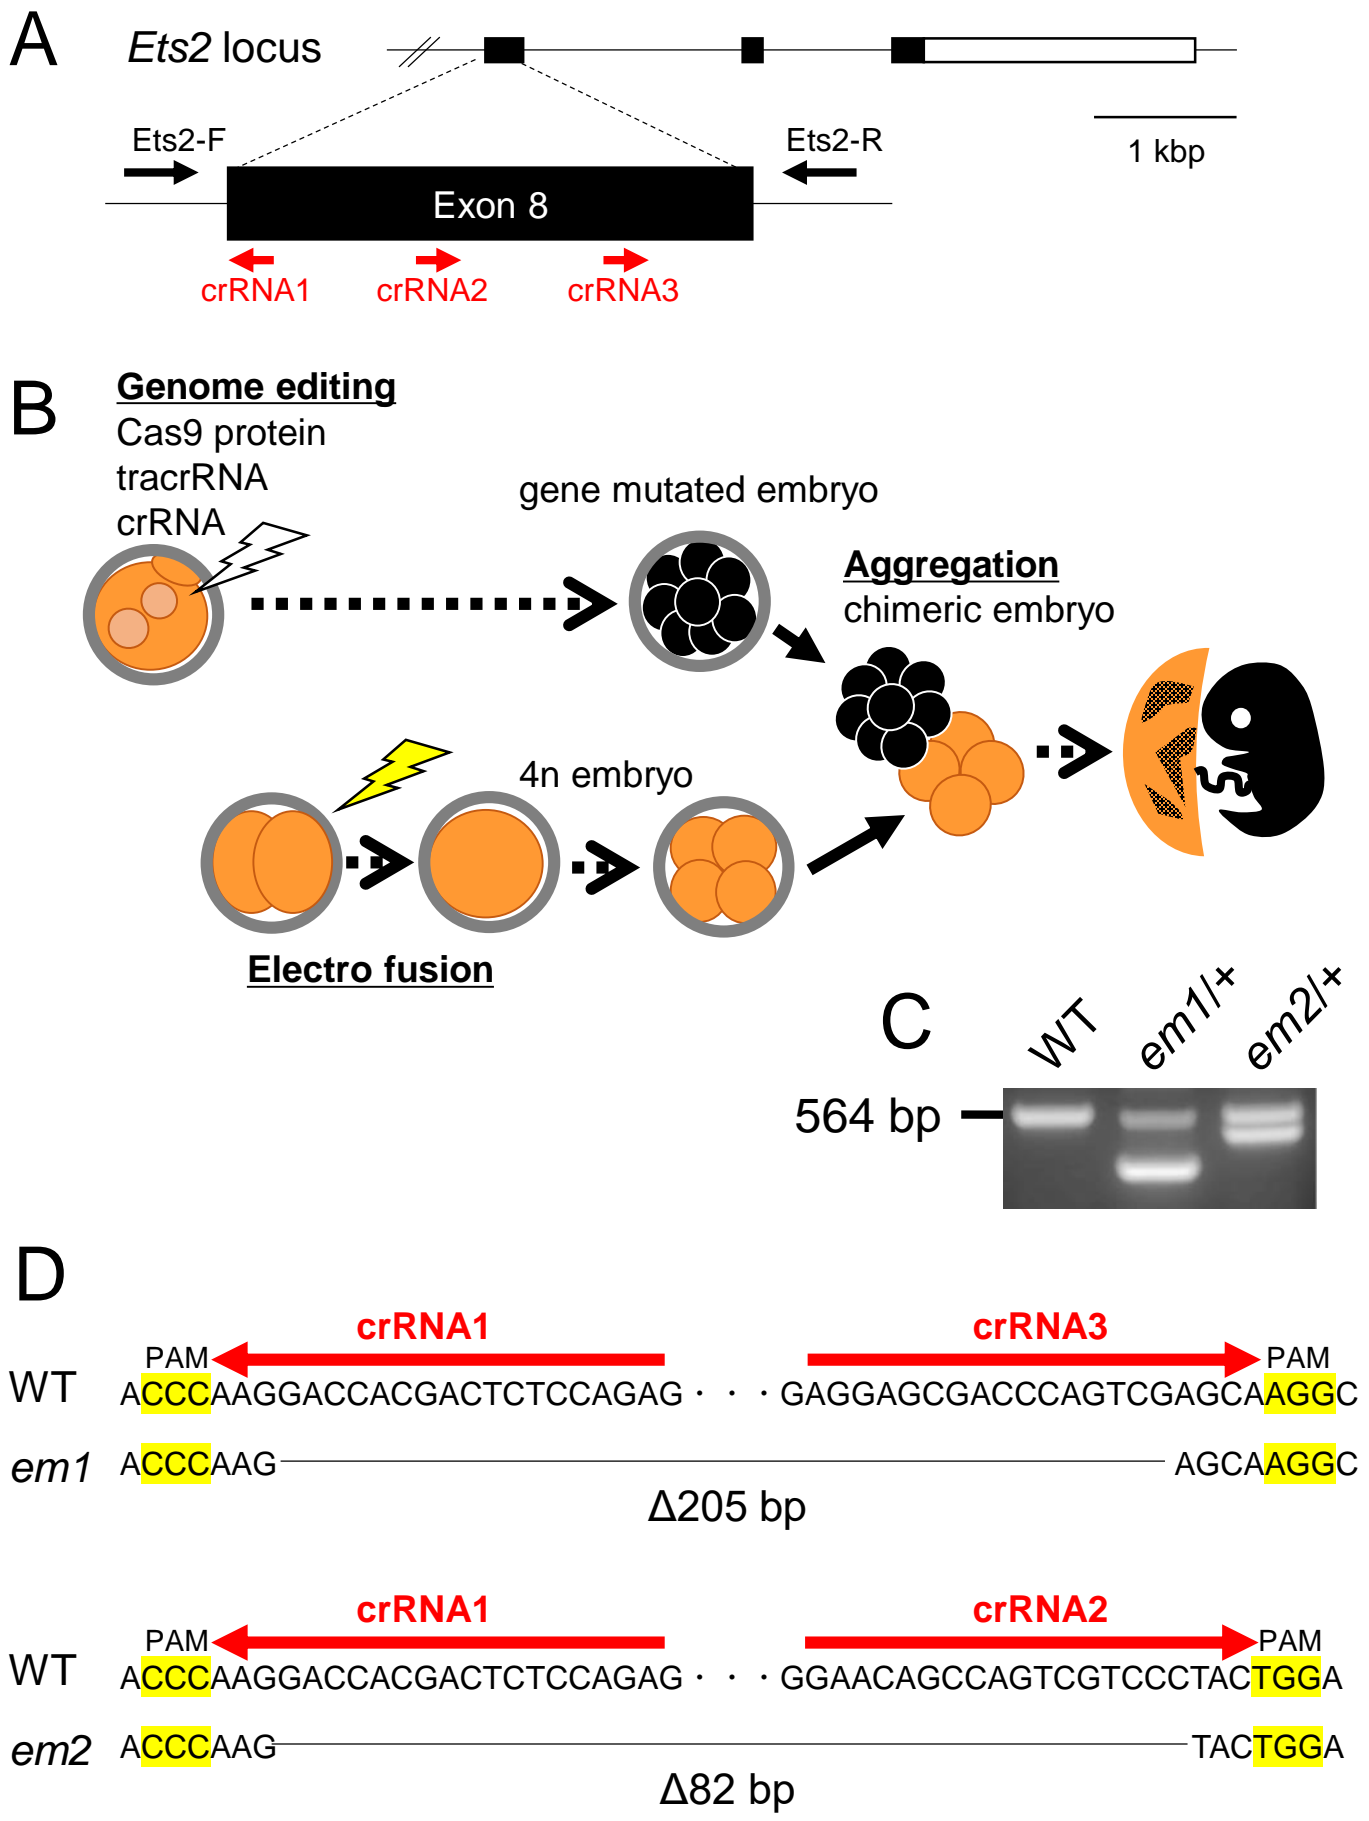



Fig 2 Y Kishimoto et al.

A

E7.5

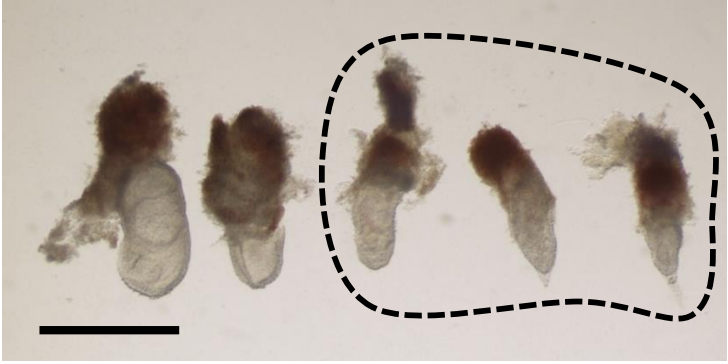

E8.5

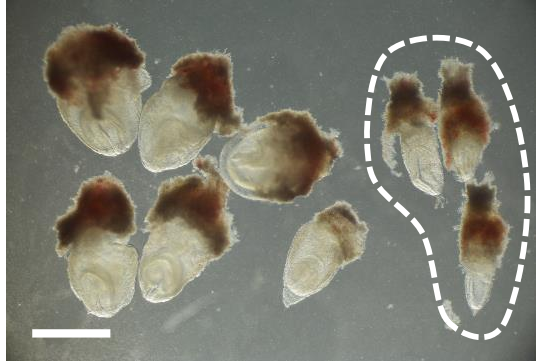

E9.5

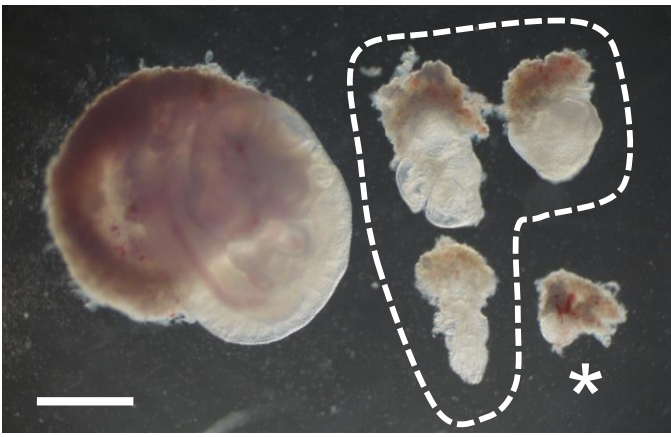

E10.5

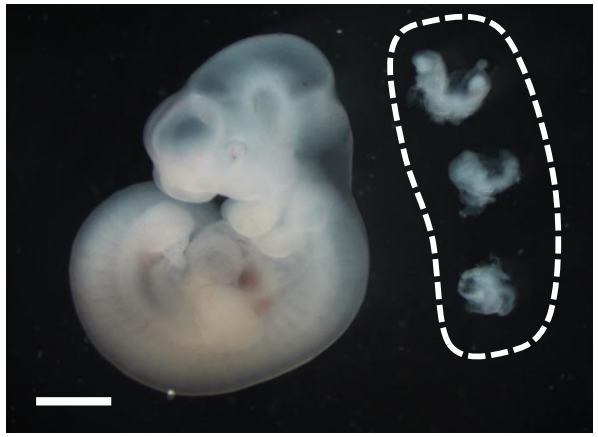

B

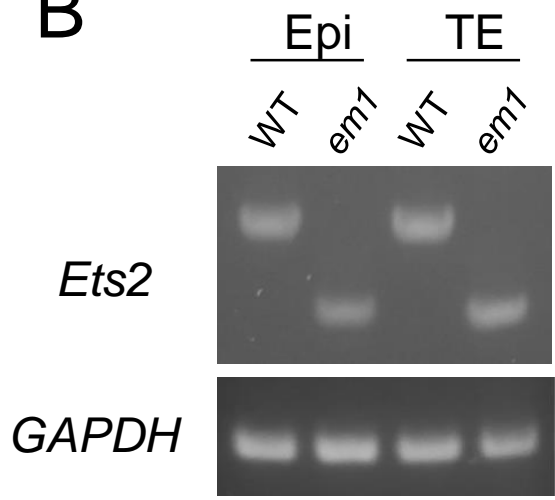

Fig 3 Y Kishimoto et al.

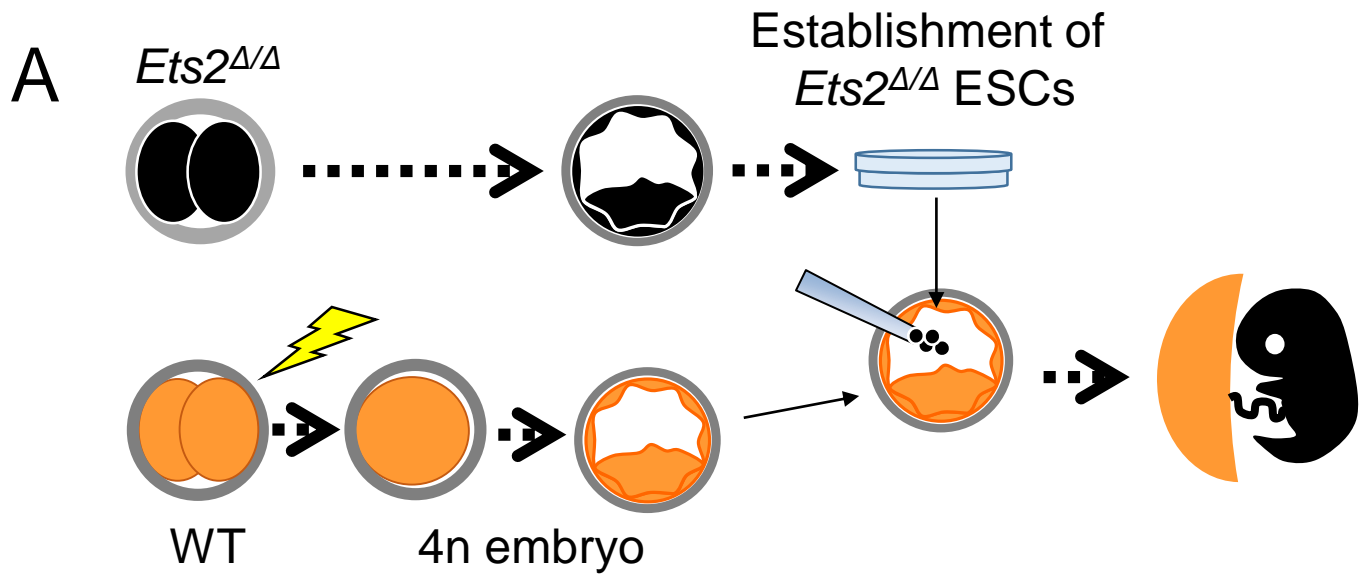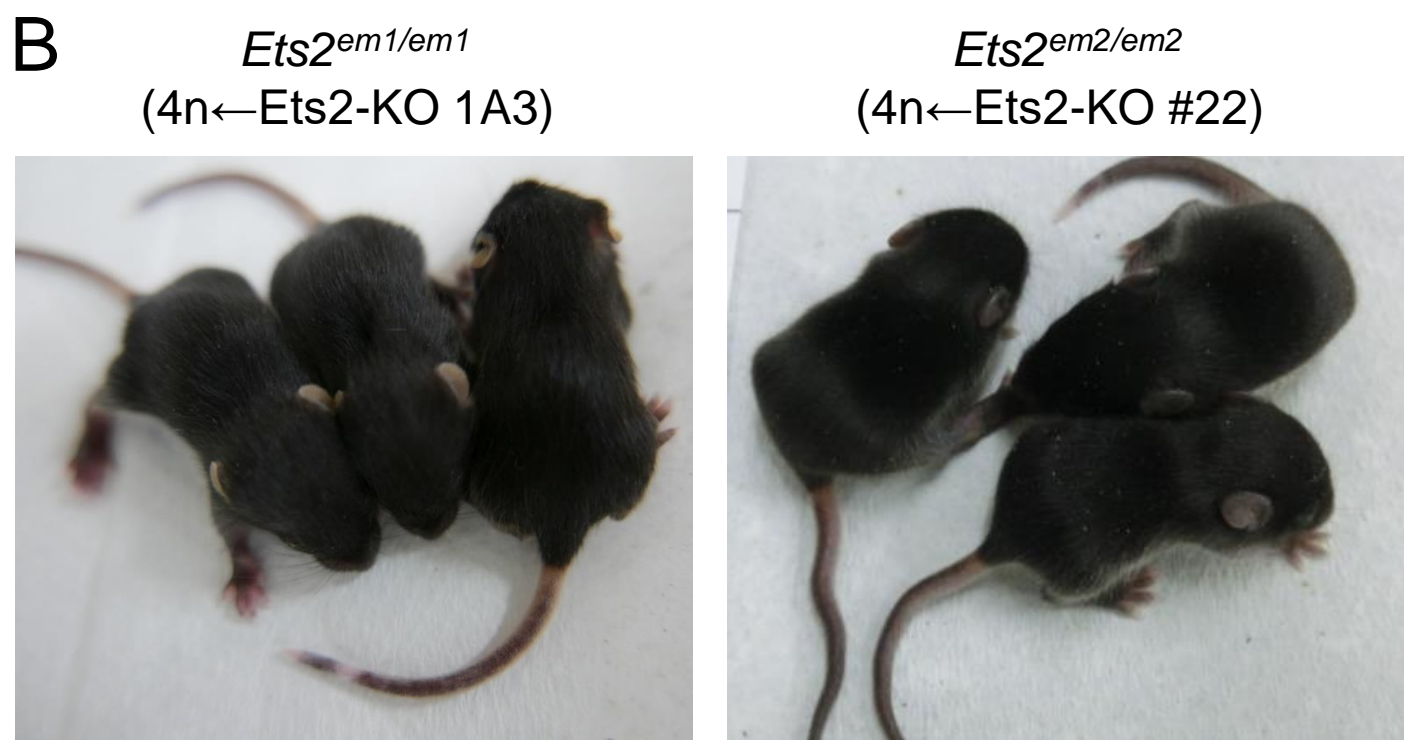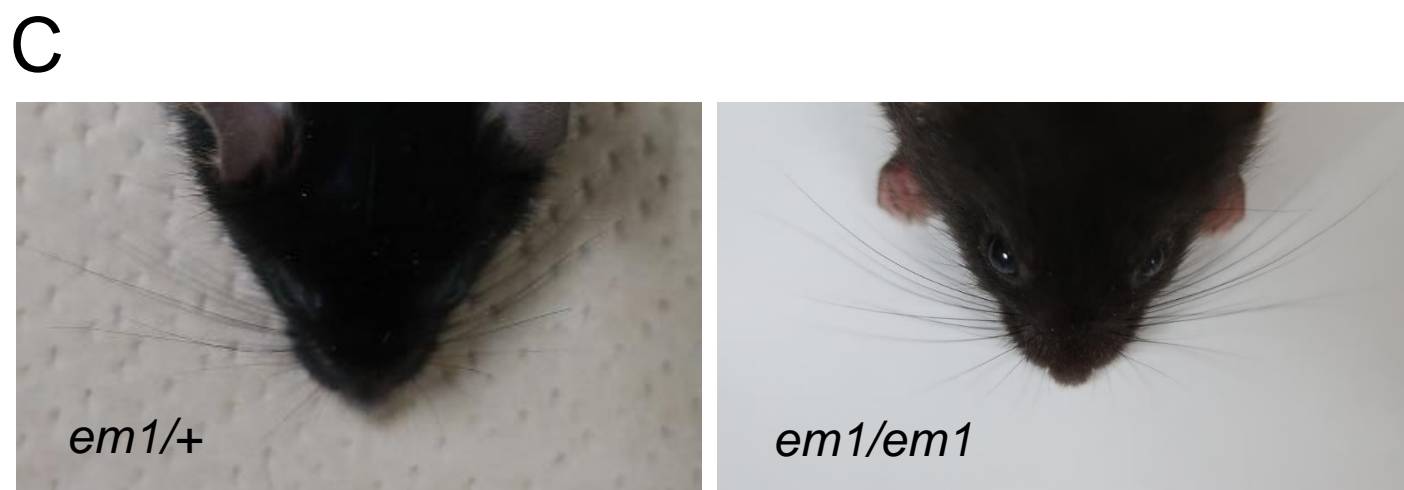

Fig 4 Y Kishimoto et al.

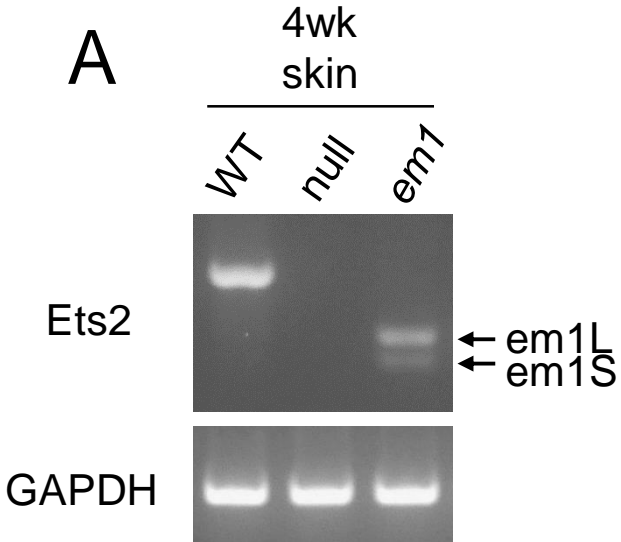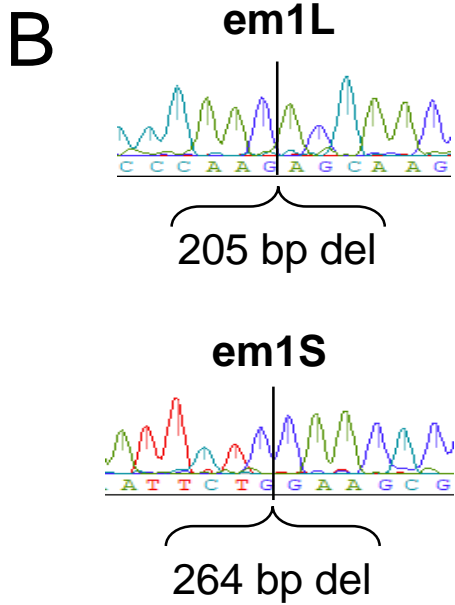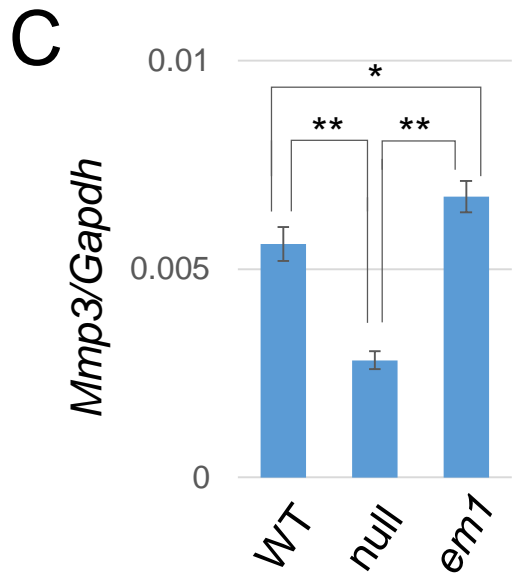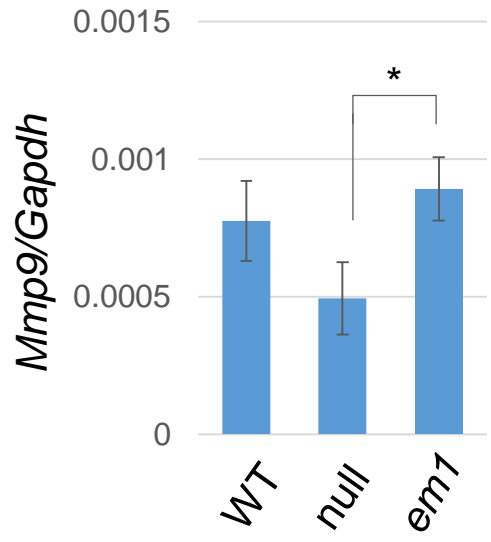

Source: https://www.biorxiv.org/content/10.1101/2020.09.27.316075v1.full.pdf
